# Supplementary material for: This Meta-Analysis Evaluates the Optimal Timing for Initiating and Discontinuing Eltrombopag for Aplastic Anemia
Source: Research Square preprint supplement (doi:10.21203/rs.3.rs-7631623/v1), 2025-10-10
Supplement: Supplementary file 1 [file f8aa1cdef6df6d46347ca974.docx]

**Supplemental materials**


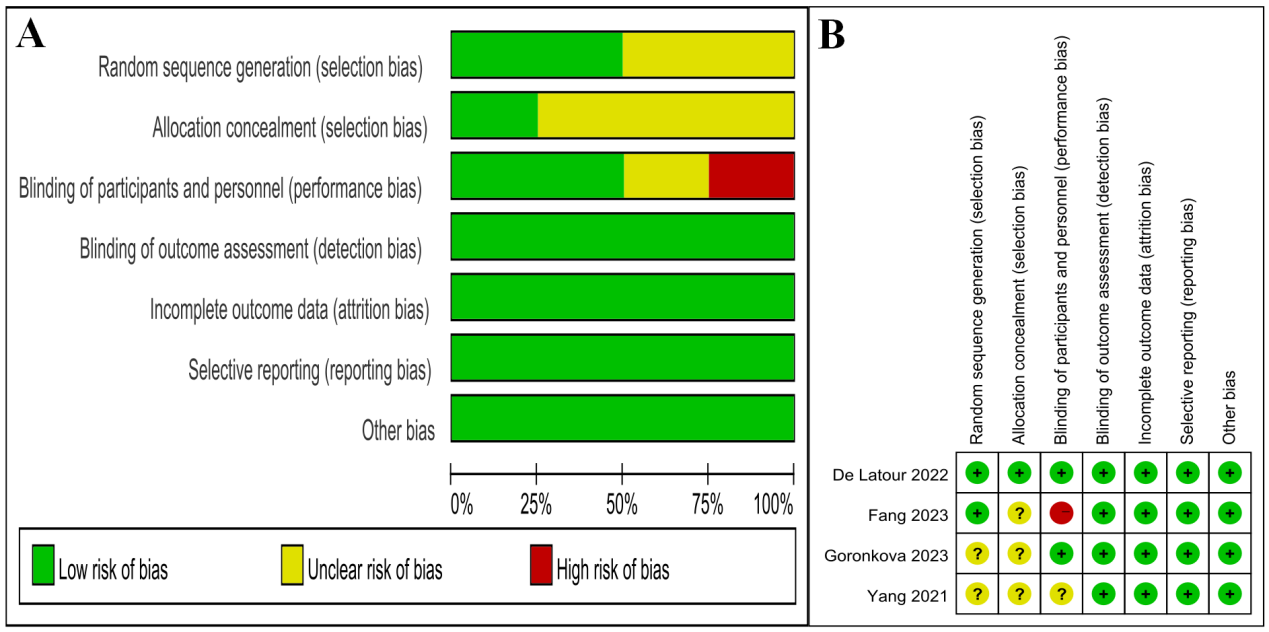


**Supplemental Figure 1.** Quality assessment of RCTs included in this meta-analysis. **A:** Risk of bias graph: Judgments about each risk of bias item presented as percentages across all included studies. **B:** Risk of bias summary: Judgments about each risk of bias item for each included study.
